# Supplementary material for: Burden of hypertension and associated risks for cardiovascular mortality in Cuba: a prospective cohort study
Source: PubMed Central journal article supplement (PMC6365887; doi:10.1016/s2468-2667(18)30210-x), 2019-01-23
Supplement: mmc1.pdf [file mmc1.pdf]

# THE LANCET

## Public Health

### **Supplementary appendix**

This appendix formed part of the original submission and has been peer reviewed. We post it as supplied by the authors.

Supplement to: Rojas NA, Dobell E, Lacey B, et al. Burden of hypertension and associated risks for cardiovascular mortality in Cuba: a prospective cohort study. *Lancet Public Health* 2019; published online Jan 22. [http://dx.doi.org/10.1016/S2468-2667\(18\)30210-X](http://dx.doi.org/10.1016/S2468-2667(18)30210-X).

*This page intentionally left blank*

# Burden of hypertension and associated risks for cardiovascular mortality in Cuba: a prospective study of 150,000 adults

## Supplementary Appendix, Table of Contents

|                                                                                                                                                       | Page |
|-------------------------------------------------------------------------------------------------------------------------------------------------------|------|
| <b>Questionnaire</b> (Spanish)                                                                                                                        | 3    |
| <b>Questionnaire</b> (English translation)                                                                                                            | 4    |
| <b>Table S1.</b> Prevalence of isolated systolic hypertension and isolated diastolic hypertension, by age and sex                                     | 5    |
| <b>Table S2.</b> Prevalence of stage 1 hypertension and stage 2 hypertension, by age and sex                                                          | 6    |
| <b>Table S3.</b> Proportion of participants with treated hypertension taking a single or multiple blood pressure-lowering medications, by age and sex | 7    |
| <b>Table S4.</b> Proportion of participants with treated hypertension taking specific types of blood pressure-lowering medication, by age and sex     | 8    |
| <b>Table S5.</b> Baseline characteristics of the 23 114 study participants that were resurveyed                                                       | 9    |
| <b>Table S6.</b> Prevalence, diagnosis, treatment and control of hypertension at baseline among resurveyed participants, by age and sex               | 10   |
| <b>Table S7.</b> Prevalence, diagnosis, treatment and control of hypertension at among resurvey participants, by age and sex                          | 11   |
| <b>Table S8.</b> Number of hypertensive participants taking 1,2,3 or 4 antihypertensives at resurvey, by age and sex                                  | 12   |
| <b>Table S9.</b> Baseline characteristics of the 127 253 study participants in the prospective analyses                                               | 13   |
| <b>Figure S2.</b> Age- and sex-specific relevance of hypertension to cardiovascular mortality                                                         | 14   |
| <b>Table S10.</b> Prevalence and control of hypertension using four different definitions of hypertension                                             | 15   |

**ESTUDIO CUBANO SOBRE TABACO Y SALUD**

Provincia No.  1-9 Municipio No.  0-99 Area de  0-9 Salud No.

**17524 A**

Carnet de -  
 Identidad No. Fecha de nacimiento (a.m.d) + 5 números  
 (11 números: excluir si no tiene C.I. de 6 + 5 números)

Nombre de la persona y dirección:   
 Calle No. Teléfono

Nombre del familiar y dirección:   
 Calle No. Municipio Provincia Teléfono

**LETRA DE MOLDE,  
 POR FAVOR**

Sexo (1 = masc, 2 = fem.)  1-2  
 Color de piel (1 = blanco, 2 = negro, 3 = mestizo, 4 = otra)  1-4  
 Estado social (1 = soltero/viudo, 2 = casado)  1-2  
 Educación completada (0 = ninguno\*, 1 = primaria, 2 = secundaria, 3 = técnico medio, 4 = obrero calificado, 5 = pre-universitario, 6 = universitario)  0-6  
 Categoría ocupacional (0 = ninguno\*, 1 = dirigente, 2 = profesional, 3 = técnico, 4 = de servicio, 5 = agrícola, 6 = industria, 7 = militar)  0-7

\* Si es cero (Ej. ama de casa, jubilado o desempleado), diga si ha trabajado alguna vez.  0-7

Quisiera medir su presión arterial mientras esta sentado, hacerle unas pocas preguntas sobre tabaco y alcohol, y medir su PA de nuevo.  
 Presión arterial (una sola toma, sentado):  /  PAS / PAD

Ahora, TABACO: ¿Ha fumado alguna vez regularmente (Ej. en la mayoría de los días)?  S=Sí, N=No  
 SI NO, vaya directamente a las preguntas sobre ALCOHOL.

¿A QUE EDAD APROXIMADAMENTE COMENZO USTED A FUMAR REGULARMENTE?  años de edad  
 ¿Desde entonces ha dejado de fumar alguna vez por un año o más?  S=Sí, N=No  
 ¿Aproximadamente cuántos cigarrillos por día se fumó usted el último mes? (0 = ninguno)  diariamente  
 ¿Aproximadamente cuántos tabacos por día se fumó usted el último mes? (0 = ninguno)  diariamente  
 ¿Si no fumó el último mes, a que edad dejó usted de fumar? (en blanco si no es aplicable)  años de edad

Ahora me gustaría hacerle algunas preguntas sobre ALCOHOL:

¿Aproximadamente cuántos días a la semana toma usted ron u otra bebida fuerte?  0-7  
 (0 = cero días o usualmente menos de una vez por semana)  
 ¿El día que usted toma ron (u otra bebida fuerte) cuántas líneas se toma?  líneas  
 ¿Aproximadamente cuántos días a la semana toma usted cerveza?  0-7  
 (0 = cero días o usualmente menos de una vez por semana)  
 ¿El día que usted toma cerveza, cuántas botellas se toma (aprox.)  botellas

Finalmente, algunos aspectos médicos: Quisiera preguntarle sobre algunas enfermedades. Lo que quiero conocer es si usted alguna vez ha sido tratado por alguna de estas enfermedades. Si no lo ha sido, conteste No (N).

|                     |                              |                              |                              |                    |                              |
|---------------------|------------------------------|------------------------------|------------------------------|--------------------|------------------------------|
| Asma                | <input type="checkbox"/> S/N | A.V.E. (definitivo/probable) | <input type="checkbox"/> S/N | Cirrosis           | <input type="checkbox"/> S/N |
| Enfisema (E.P.O.C.) | <input type="checkbox"/> S/N | Infarto miocardio            | <input type="checkbox"/> S/N | Enf. renal crónica | <input type="checkbox"/> S/N |
| Diabetes            | <input type="checkbox"/> S/N | Angina pectoris              | <input type="checkbox"/> S/N | Cáncer de piel     | <input type="checkbox"/> S/N |
| Úlcera péptica      | <input type="checkbox"/> S/N | Hipertensión arterial        | <input type="checkbox"/> S/N | Otro cáncer*       | <input type="checkbox"/> S/N |

\*Si Otro Cáncer = Sí, dónde le comenzó el cáncer?  0-9

(1 = boca o faringe, 2 = laringe, 3 = pulmón, 4 = esófago, 5 = estómago, 6 = páncreas, 7 = cuello útero, 8 = vejiga, 9 = mama, 0 = otro, más de un sitio, o no conocido)

¿Esta usted tomando alguna medicina regularmente desde hace más de un mes? Si es Sí: ¿Qué medicinas esta tomando? (Marque con X)

|           |                          |          |                          |                |                          |              |                          |              |                          |
|-----------|--------------------------|----------|--------------------------|----------------|--------------------------|--------------|--------------------------|--------------|--------------------------|
| Digoxina  | <input type="checkbox"/> | Nitratos | <input type="checkbox"/> | Hipoglic. oral | <input type="checkbox"/> | Anticoncept. | <input type="checkbox"/> | Ca. Antag.   | <input type="checkbox"/> |
| Beta B.   | <input type="checkbox"/> | Inh. ACE | <input type="checkbox"/> | Insulina       | <input type="checkbox"/> | Antidepres.  | <input type="checkbox"/> | Broncodilat. | <input type="checkbox"/> |
| Diurético | <input type="checkbox"/> | ASA      | <input type="checkbox"/> | Esteroides     | <input type="checkbox"/> | Ansiolítico  | <input type="checkbox"/> | Antiácido/H2 | <input type="checkbox"/> |

MUCHAS GRACIAS POR SUS RESPUESTAS: Ahora necesito tomarle

de nuevo su presión arterial. Repita la toma de PA (una sola toma sentado):  /  PAS/PAD

¿Cuál es la última cifra PA que tiene en su historia clínica antes de hoy?

Fecha de la última PA (a.m.d)  &  /  PAS/PAD

¿Cuál es su TALLA aproximada? (medirlo o preguntarlo)  cm

¿Cuál es su PESO aproximado? (pesarlo o preguntarlo)  kg

Fecha de la entrevista  (a.m.d)

Calidad de la cooperación (1 = pobre, 2 = regular, 3 = buena)  1-3

Nombre y apellidos del entrevistador:

¿Algún comentario? .....

**PARA LA SIGUIENTE PERSONA, UTILICE EL REVERSO DE ESTA PAGINA →**



**Table S1. Prevalence of isolated systolic hypertension and isolated diastolic hypertension, by age and sex**

| Age at entry<br>(years) | No. of<br>participants | SBP (mmHg):<br>DBP(mmHg): | Hypertension (%)                      |                                        |                           |                               | All         |
|-------------------------|------------------------|---------------------------|---------------------------------------|----------------------------------------|---------------------------|-------------------------------|-------------|
|                         |                        |                           | Isolated systolic<br>>=140<br>and <90 | Isolated diastolic<br><140<br>and >=90 | Both<br>>=140<br>and >=90 | Controlled<br><140<br>and <90 |             |
| <b>Male</b>             |                        |                           |                                       |                                        |                           |                               |             |
| 35-39                   | 9291                   |                           | 3.1                                   | 6.8                                    | 6.8                       | 2.2                           | 18.9        |
| 40-49                   | 16 774                 |                           | 4.1                                   | 8.4                                    | 10.4                      | 3.5                           | 26.4        |
| 50-59                   | 15 347                 |                           | 5.2                                   | 9.4                                    | 14.9                      | 5.4                           | 34.9        |
| 60-69                   | 11 192                 |                           | 7.7                                   | 8.9                                    | 18.6                      | 6.0                           | 41.2        |
| 70-79                   | 7560                   |                           | 9.6                                   | 8.7                                    | 18.0                      | 6.2                           | 42.5        |
| <b>All</b>              | <b>60 164</b>          |                           | <b>5.6</b>                            | <b>8.5</b>                             | <b>13.4</b>               | <b>4.5</b>                    | <b>32.0</b> |
| <b>Female</b>           |                        |                           |                                       |                                        |                           |                               |             |
| 35-39                   | 12 301                 |                           | 2.0                                   | 4.5                                    | 4.8                       | 2.8                           | 14.1        |
| 40-49                   | 21 651                 |                           | 3.4                                   | 6.6                                    | 9.5                       | 5.2                           | 24.7        |
| 50-59                   | 19 014                 |                           | 5.8                                   | 8.9                                    | 17.1                      | 8.8                           | 40.6        |
| 60-69                   | 13 920                 |                           | 8.7                                   | 8.7                                    | 21.9                      | 10.1                          | 49.4        |
| 70-79                   | 9061                   |                           | 12.2                                  | 7.6                                    | 21.3                      | 9.1                           | 50.2        |
| <b>All</b>              | <b>75 947</b>          |                           | <b>5.8</b>                            | <b>7.4</b>                             | <b>14.4</b>               | <b>7.1</b>                    | <b>34.7</b> |
| <b>Both</b>             |                        |                           |                                       |                                        |                           |                               |             |
| 35-39                   | 21 592                 |                           | 2.5                                   | 5.5                                    | 5.7                       | 2.5                           | 16.2        |
| 40-49                   | 38 425                 |                           | 3.7                                   | 7.4                                    | 9.9                       | 4.4                           | 25.5        |
| 50-59                   | 34 361                 |                           | 5.5                                   | 9.1                                    | 16.1                      | 7.3                           | 38.1        |
| 60-69                   | 25 112                 |                           | 8.2                                   | 8.8                                    | 20.4                      | 8.3                           | 45.8        |
| 70-79                   | 16 621                 |                           | 11.0                                  | 8.1                                    | 19.9                      | 7.8                           | 46.8        |
| <b>Overall</b>          | <b>136 111</b>         |                           | <b>5.7</b>                            | <b>7.9</b>                             | <b>13.9</b>               | <b>6.0</b>                    | <b>33.5</b> |

SBP = systolic blood pressure; DBP = diastolic blood pressure. Analyses are standardised for area, and where appropriate for age and sex. Exclusions as in Table 1.

Each percentage is that of the specified subgroup of the participants in each row.

**Table S2. Prevalence of stage 1 hypertension and stage 2 hypertension, by age and sex**

| Age at entry<br>(years) | No. of<br>participants | SBP (mmHg):<br>DBP(mmHg): | Hypertension (%)               |                              |                               | All         |
|-------------------------|------------------------|---------------------------|--------------------------------|------------------------------|-------------------------------|-------------|
|                         |                        |                           | Stage 1<br>140-159<br>or 90-99 | Stage 2<br>>=160<br>or >=100 | Controlled<br><140<br>and <90 |             |
| <b>Male</b>             |                        |                           |                                |                              |                               |             |
| 35-39                   | 9291                   |                           | 13.4                           | 3.3                          | 2.2                           | 18.9        |
| 40-49                   | 16 774                 |                           | 17.7                           | 5.2                          | 3.5                           | 26.4        |
| 50-59                   | 15 347                 |                           | 22.2                           | 7.3                          | 5.4                           | 34.9        |
| 60-69                   | 11 192                 |                           | 26.0                           | 9.2                          | 6.0                           | 41.2        |
| 70-79                   | 7560                   |                           | 26.7                           | 9.6                          | 6.2                           | 42.5        |
| <b>All</b>              | <b>60 164</b>          |                           | <b>20.8</b>                    | <b>6.7</b>                   | <b>4.5</b>                    | <b>32.0</b> |
| <b>Female</b>           |                        |                           |                                |                              |                               |             |
| 35-39                   | 12 301                 |                           | 9.0                            | 2.3                          | 2.8                           | 14.1        |
| 40-49                   | 21 651                 |                           | 14.8                           | 4.7                          | 5.2                           | 24.7        |
| 50-59                   | 19 014                 |                           | 22.9                           | 8.9                          | 8.8                           | 40.6        |
| 60-69                   | 13 920                 |                           | 27.5                           | 11.7                         | 10.1                          | 49.4        |
| 70-79                   | 9061                   |                           | 28.4                           | 12.7                         | 9.1                           | 50.2        |
| <b>All</b>              | <b>75 947</b>          |                           | <b>19.9</b>                    | <b>7.7</b>                   | <b>7.1</b>                    | <b>34.7</b> |
| <b>Both</b>             |                        |                           |                                |                              |                               |             |
| 35-39                   | 21 592                 |                           | 10.9                           | 2.8                          | 2.5                           | 16.2        |
| 40-49                   | 38 425                 |                           | 16.1                           | 4.9                          | 4.4                           | 25.5        |
| 50-59                   | 34 361                 |                           | 22.6                           | 8.2                          | 7.3                           | 38.1        |
| 60-69                   | 25 112                 |                           | 26.8                           | 10.6                         | 8.3                           | 45.8        |
| 70-79                   | 16 621                 |                           | 27.6                           | 11.4                         | 7.8                           | 46.8        |
| <b>Overall</b>          | <b>136 111</b>         |                           | <b>20.3</b>                    | <b>7.2</b>                   | <b>6.0</b>                    | <b>33.5</b> |

SBP = systolic blood pressure; DBP = diastolic blood pressure. Analyses are standardised for area, and where appropriate for age and sex.

Exclusions as in Table 1. Each percentage is that of the specified subgroup of the participants in each row.

**Table S3. Proportion of participants with treated hypertension taking a single or multiple blood pressure-lowering medications, by age and sex**

| Age at entry<br>(years) | Treated<br>hypertensives, N | Treated hypertensives, N (%) |                    |                  |                |
|-------------------------|-----------------------------|------------------------------|--------------------|------------------|----------------|
|                         |                             | 1 medication                 | 2 medications      | 3 medications    | 4 medications  |
| <b>Male</b>             |                             |                              |                    |                  |                |
| 35-39                   | 584                         | 407 (69.7)                   | 162 (27.7)         | 15 (2.6)         | 0 (0.0)        |
| 40-49                   | 1728                        | 1209 (70.0)                  | 463 (26.8)         | 55 (3.2)         | 1 (0.1)        |
| 50-59                   | 2502                        | 1705 (68.1)                  | 729 (29.1)         | 66 (2.6)         | 2 (0.1)        |
| 60-69                   | 2240                        | 1582 (70.6)                  | 595 (26.6)         | 62 (2.8)         | 1 (0.0)        |
| 70-79                   | 1490                        | 1038 (69.7)                  | 409 (27.5)         | 42 (2.8)         | 1 (0.1)        |
| <b>Female</b>           |                             |                              |                    |                  |                |
| 35-39                   | 779                         | 539 (69.2)                   | 226 (29.0)         | 14 (1.8)         | 0 (0.0)        |
| 40-49                   | 2938                        | 2049 (69.7)                  | 806 (27.4)         | 83 (2.8)         | 0 (0.0)        |
| 50-59                   | 4712                        | 3192 (67.7)                  | 1381 (29.3)        | 139 (3.0)        | 0 (0.0)        |
| 60-69                   | 4216                        | 2939 (69.7)                  | 1165 (27.6)        | 112 (2.7)        | 0 (0.0)        |
| 70-79                   | 2568                        | 1825 (71.1)                  | 686 (26.7)         | 57 (2.2)         | 0 (0.0)        |
| <b>Both</b>             |                             |                              |                    |                  |                |
| 35-39                   | 1363                        | 946 (69.4)                   | 388 (28.5)         | 29 (2.1)         | 0 (0.0)        |
| 40-49                   | 4666                        | 3258 (69.8)                  | 1269 (27.2)        | 138 (3.0)        | 1 (0.0)        |
| 50-59                   | 7214                        | 4897 (67.9)                  | 2110 (29.2)        | 205 (2.8)        | 2 (0.0)        |
| 60-69                   | 6456                        | 4521 (70.0)                  | 1760 (27.3)        | 174 (2.7)        | 1 (0.0)        |
| 70-79                   | 4058                        | 2863 (70.6)                  | 1095 (27.0)        | 99 (2.4)         | 1 (0.0)        |
| <b>Overall</b>          | <b>23 757</b>               | <b>16 485 (69.4)</b>         | <b>6622 (27.9)</b> | <b>645 (2.7)</b> | <b>5 (0.0)</b> |

SBP = systolic blood pressure; DBP = diastolic blood pressure. Analyses are standardised for area, and where appropriate for age and sex.

Exclusions as in Table 1. Each percentage is that of the specified subgroup of the participants in each row.



**Table S4. Proportion of participants with treated hypertension taking specific types of blood pressure-lowering medication, by age and sex**

| Age at entry<br>(years) | Treated<br>hypertensives, N | % of treated hypertensives |                   |                                |             | % of treated hypertensives<br>(single blood pressure-lowering medication only) |                   |                                |             |             |
|-------------------------|-----------------------------|----------------------------|-------------------|--------------------------------|-------------|--------------------------------------------------------------------------------|-------------------|--------------------------------|-------------|-------------|
|                         |                             | ACE-<br>inhibitors         | Beta-<br>blockers | Calcium<br>channel<br>blockers | Diuretics   | ACE-<br>inhibitors                                                             | Beta-<br>blockers | Calcium<br>channel<br>blockers | Diuretics   | Any         |
| <b>Male</b>             |                             |                            |                   |                                |             |                                                                                |                   |                                |             |             |
| 35-39                   | 584                         | 5.7                        | 40.6              | 26.7                           | 59.9        | 3.3                                                                            | 20.2              | 13.2                           | 33.0        | <b>69.7</b> |
| 40-49                   | 1728                        | 5.7                        | 40.0              | 27.7                           | 59.9        | 2.9                                                                            | 19.5              | 13.8                           | 33.8        | <b>70.0</b> |
| 50-59                   | 2502                        | 5.5                        | 41.6              | 29.4                           | 58.1        | 2.8                                                                            | 20.0              | 15.3                           | 30.1        | <b>68.1</b> |
| 60-69                   | 2240                        | 5.0                        | 34.7              | 33.8                           | 58.7        | 2.3                                                                            | 16.0              | 18.8                           | 33.5        | <b>70.6</b> |
| 70-79                   | 1490                        | 3.4                        | 33.9              | 34.4                           | 61.7        | 2.1                                                                            | 14.4              | 18.9                           | 34.2        | <b>69.7</b> |
| <b>Female</b>           |                             |                            |                   |                                |             |                                                                                |                   |                                |             |             |
| 35-39                   | 779                         | 6.5                        | 40.4              | 20.9                           | 64.7        | 2.4                                                                            | 18.5              | 11.7                           | 36.6        | <b>69.2</b> |
| 40-49                   | 2938                        | 4.7                        | 41.6              | 23.8                           | 63.0        | 2.2                                                                            | 19.5              | 11.7                           | 36.3        | <b>69.7</b> |
| 50-59                   | 4712                        | 4.5                        | 40.9              | 29.2                           | 60.7        | 1.9                                                                            | 18.7              | 14.5                           | 32.7        | <b>67.7</b> |
| 60-69                   | 4216                        | 4.6                        | 35.7              | 32.7                           | 60.0        | 2.1                                                                            | 16.2              | 17.8                           | 33.6        | <b>69.7</b> |
| 70-79                   | 2568                        | 5.1                        | 30.6              | 33.2                           | 62.2        | 2.4                                                                            | 13.6              | 19.4                           | 35.7        | <b>71.1</b> |
| <b>Both</b>             |                             |                            |                   |                                |             |                                                                                |                   |                                |             |             |
| 35-39                   | 1363                        | 6.2                        | 40.5              | 23.4                           | 62.7        | 2.8                                                                            | 19.2              | 12.3                           | 35.1        | <b>69.4</b> |
| 40-49                   | 4666                        | 5.0                        | 41.0              | 25.2                           | 61.9        | 2.4                                                                            | 19.5              | 12.5                           | 35.4        | <b>69.8</b> |
| 50-59                   | 7214                        | 4.9                        | 41.1              | 29.2                           | 59.8        | 2.2                                                                            | 19.1              | 14.8                           | 31.8        | <b>67.9</b> |
| 60-69                   | 6456                        | 4.7                        | 35.3              | 33.1                           | 59.6        | 2.2                                                                            | 16.2              | 18.2                           | 33.6        | <b>70.0</b> |
| 70-79                   | 4058                        | 4.5                        | 31.8              | 33.6                           | 62.0        | 2.3                                                                            | 13.9              | 19.2                           | 35.1        | <b>70.6</b> |
| <b>Overall</b>          | <b>23 757</b>               | <b>4.9</b>                 | <b>37.9</b>       | <b>29.9</b>                    | <b>60.7</b> | <b>2.3</b>                                                                     | <b>17.5</b>       | <b>15.9</b>                    | <b>33.7</b> | <b>69.4</b> |

SBP = systolic blood pressure; DBP = diastolic blood pressure. Analyses are standardised for area, and where appropriate for age and sex.

Exclusions as in Table 1. Each percentage is that of the specified subgroup of the participants in each row.

**Table S5. Baseline characteristics of the 23 114 study participants that were resurveyed\***

|                                            | <b>Men</b><br>(10 183) | <b>Women</b><br>(12 931) | <b>All</b><br>(23 114) |
|--------------------------------------------|------------------------|--------------------------|------------------------|
| Age at entry (years), n (%)                |                        |                          |                        |
| 35-39                                      | 1784 (18)              | 2352 (18)                | 4136 (18)              |
| 40-49                                      | 2717 (27)              | 3708 (29)                | 6425 (28)              |
| 50-59                                      | 2813 (28)              | 3362 (26)                | 6175 (27)              |
| 60-69                                      | 1788 (18)              | 2198 (17)                | 3986 (17)              |
| 70-79                                      | 1081 (11)              | 1311 (10)                | 2392 (10)              |
| Age (years), mean (SD)                     | 53 (12)                | 53 (12)                  | 53 (12)                |
| Blood pressure (mm Hg), mean (SD)          |                        |                          |                        |
| Systolic                                   | 126 (17)               | 124 (20)                 | 125 (18)               |
| Diastolic                                  | 81 (10)                | 79 (12)                  | 80 (11)                |
| Area, n (%)†                               |                        |                          |                        |
| Matanzas                                   | 10 183 (100)           | 12 931 (100)             | 23 114 (100)           |
| Camagüey                                   | 0 (0)                  | 0 (0)                    | 0 (0)                  |
| Pinar del Río                              | 0 (0)                  | 0 (0)                    | 0 (0)                  |
| Ciudad de La Habana                        | 0 (0)                  | 0 (0)                    | 0 (0)                  |
| La Habana                                  | 0 (0)                  | 0 (0)                    | 0 (0)                  |
| Educational level, n (%)                   |                        |                          |                        |
| Less than primary                          | 710 (7)                | 1125 (9)                 | 1835 (8)               |
| Primary                                    | 2700 (27)              | 4207 (33)                | 6907 (30)              |
| Lower secondary                            | 3002 (29)              | 3694 (29)                | 6696 (29)              |
| High school/technical college              | 2862 (28)              | 2950 (23)                | 5812 (25)              |
| University                                 | 909 (9)                | 955 (7)                  | 1864 (8)               |
| Ethnicity                                  |                        |                          |                        |
| White                                      | 7919 (78)              | 9947 (77)                | 17 866 (77)            |
| Black                                      | 1606 (16)              | 1945 (15)                | 3551 (15)              |
| Mixed                                      | 649 (6)                | 1024 (8)                 | 1673 (7)               |
| Other                                      | 9 (<1)                 | 15 (<1)                  | 24 (<1)                |
| Prior cardiovascular disease               |                        |                          |                        |
| No                                         | 9706 (95)              | 12 404 (96)              | 22 110 (96)            |
| Yes                                        | 477 (5)                | 527 (4)                  | 1004 (4)               |
| Season of baseline survey, n (%)†          |                        |                          |                        |
| Spring                                     | 5135 (50)              | 7038 (54)                | 12 173 (53)            |
| Summer                                     | 3376 (33)              | 3521 (27)                | 6897 (30)              |
| Autumn                                     | 599 (6)                | 837 (6)                  | 1436 (6)               |
| Winter                                     | 1073 (11)              | 1535 (12)                | 2608 (11)              |
| Ever smoked tobacco, n (%)                 | 5761 (57)              | 3937 (30)                | 9698 (42)              |
| At least weekly alcohol consumption, n (%) | 2215 (22)              | 211 (2)                  | 2426 (10)              |
| BMI (kg/m <sup>2</sup> ), mean (SD)        | 24.6 (3.8)             | 25.2 (4.5)               | 24.9 (4.2)             |

\*Exclusion as in Table 1, with further exclusion of participants with missing or implausible blood pressure values at resurvey.

†Spring indicates March to May; Summer, June to August; Autumn, September to November; Winter, December to February.

**Table S6. Prevalence, diagnosis, treatment and control of hypertension at baseline among resurveyed participants, by age and sex**

| Age at baseline<br>(years) | No. of participants | Prevalence of<br>hypertension, % | Diagnosed among<br>hypertensives, % | Treated among<br>diagnosed, % | Controlled       |                               |
|----------------------------|---------------------|----------------------------------|-------------------------------------|-------------------------------|------------------|-------------------------------|
|                            |                     |                                  |                                     |                               | Among treated, % | Among all<br>hypertensives, % |
| <b>Male</b>                |                     |                                  |                                     |                               |                  |                               |
| 35-39                      | 1784                | 18.8                             | 37.5                                | 55.6                          | 42.9             | 8.9                           |
| 40-49                      | 2717                | 28.3                             | 41.3                                | 61.9                          | 38.6             | 9.9                           |
| 50-59                      | 2813                | 37.5                             | 49.3                                | 68.5                          | 32.9             | 11.1                          |
| 60-69                      | 1788                | 42.7                             | 49.7                                | 73.2                          | 28.4             | 10.3                          |
| 70-79                      | 182                 | 45.6                             | 54.2                                | 62.2                          | 35.7             | 12.0                          |
| <b>All</b>                 | <b>9 284</b>        | <b>32.2</b>                      | <b>46.0</b>                         | <b>66.7</b>                   | <b>33.7</b>      | <b>10.4</b>                   |
| <b>Female</b>              |                     |                                  |                                     |                               |                  |                               |
| 35-39                      | 2352                | 12.8                             | 48.5                                | 66.4                          | 45.4             | 14.6                          |
| 40-49                      | 3708                | 26.2                             | 62.6                                | 73.1                          | 37.8             | 17.3                          |
| 50-59                      | 3362                | 43.6                             | 68.0                                | 75.5                          | 34.0             | 17.5                          |
| 60-69                      | 2198                | 51.8                             | 70.9                                | 74.4                          | 27.6             | 14.6                          |
| 70-79                      | 234                 | 53.0                             | 69.4                                | 80.2                          | 27.5             | 15.3                          |
| <b>All</b>                 | <b>11 854</b>       | <b>34.0</b>                      | <b>66.2</b>                         | <b>74.3</b>                   | <b>33.2</b>      | <b>16.3</b>                   |
| <b>Both</b>                |                     |                                  |                                     |                               |                  |                               |
| 35-39                      | 4136                | 15.5                             | 42.6                                | 61.3                          | 44.3             | 11.6                          |
| 40-49                      | 6425                | 27.1                             | 52.8                                | 69.1                          | 38.1             | 13.9                          |
| 50-59                      | 6175                | 40.9                             | 60.5                                | 73.2                          | 33.7             | 14.9                          |
| 60-69                      | 3986                | 47.8                             | 62.6                                | 74.0                          | 27.9             | 12.9                          |
| 70-79                      | 416                 | 49.7                             | 63.3                                | 74.0                          | 29.9             | 14.0                          |
| <b>All (40-79)</b>         | <b>17 002</b>       | <b>37.5</b>                      | <b>59.0</b>                         | <b>72.5</b>                   | <b>32.7</b>      | <b>14.0</b>                   |
| <b>All (35-79)</b>         | <b>21 138</b>       | <b>33.2</b>                      | <b>57.6</b>                         | <b>71.7</b>                   | <b>33.4</b>      | <b>13.8</b>                   |

SBP = systolic blood pressure; DBP = diastolic blood pressure. Analyses are standardised for area, and where appropriate for age and sex. Exclusions as in Table 1, with further exclusion of participants with missing or implausible blood pressure values at resurvey, and those aged less than 40 or 80 and over at resurvey.

Each percentage is that of the specified subgroup of the participants in each row.

**Table S7. Prevalence, diagnosis, treatment and control of hypertension at among resurveyed participants, by age and sex**

| Age at resurvey<br>(years) | No. of participants | Prevalence of<br>hypertension, % | Diagnosed among<br>hypertensives, % | Treated among<br>diagnosed, % | Controlled       |                               |
|----------------------------|---------------------|----------------------------------|-------------------------------------|-------------------------------|------------------|-------------------------------|
|                            |                     |                                  |                                     |                               | Among treated, % | Among all<br>hypertensives, % |
| <b>Male</b>                |                     |                                  |                                     |                               |                  |                               |
| 40-49                      | 2147                | 29.5                             | 53.6                                | 79.6                          | 67.4             | 28.8                          |
| 50-59                      | 2811                | 38.1                             | 55.9                                | 78.0                          | 56.3             | 24.5                          |
| 60-69                      | 2687                | 42.9                             | 62.3                                | 76.5                          | 49.3             | 23.5                          |
| 70-79                      | 1639                | 45.0                             | 64.7                                | 73.0                          | 50.9             | 24.0                          |
| <b>All</b>                 | <b>9284</b>         | <b>37.4</b>                      | <b>57.8</b>                         | <b>77.5</b>                   | <b>57.6</b>      | <b>25.6</b>                   |
| <b>Female</b>              |                     |                                  |                                     |                               |                  |                               |
| 40-49                      | 2842                | 25.3                             | 59.4                                | 83.2                          | 72.5             | 35.8                          |
| 50-59                      | 3733                | 42.2                             | 65.5                                | 77.7                          | 59.4             | 30.2                          |
| 60-69                      | 3183                | 51.7                             | 75.6                                | 73.2                          | 51.9             | 28.8                          |
| 70-79                      | 2096                | 56.3                             | 76.8                                | 69.4                          | 42.5             | 22.6                          |
| <b>All</b>                 | <b>11 854</b>       | <b>40.5</b>                      | <b>67.2</b>                         | <b>77.4</b>                   | <b>59.8</b>      | <b>30.7</b>                   |
| <b>Both</b>                |                     |                                  |                                     |                               |                  |                               |
| 40-49                      | 4989                | 27.2                             | 56.6                                | 81.6                          | 70.2             | 32.5                          |
| 50-59                      | 6544                | 40.4                             | 61.5                                | 77.8                          | 58.3             | 27.9                          |
| 60-69                      | 5870                | 47.8                             | 70.4                                | 74.4                          | 51.0             | 26.7                          |
| 70-79                      | 3735                | 51.3                             | 72.1                                | 70.6                          | 45.5             | 23.2                          |
| <b>Overall</b>             | <b>21 138</b>       | <b>39.1</b>                      | <b>63.1</b>                         | <b>77.4</b>                   | <b>58.8</b>      | <b>28.5</b>                   |

SBP = systolic blood pressure; DBP = diastolic blood pressure. Analyses are standardised for area, and where appropriate for age and sex. Exclusions as in Table 1, with further exclusion of participants with missing or implausible blood pressure values at resurvey, and those aged less than 40 or 80 and over at resurvey. Each percentage is that of the specified subgroup of the participants in each row.

**Table S8. Proportion of participants with treated hypertension at resurvey taking a single or multiple blood pressure-lowering medications, by age and sex**

| Age at resurvey<br>(years) | Treated with<br>hypertensives, N | Treated hypertensives, N (%) |                    |                  |                |
|----------------------------|----------------------------------|------------------------------|--------------------|------------------|----------------|
|                            |                                  | 1 medication                 | 2 medications      | 3 medications    | 4 medications  |
| <b>Male</b>                |                                  |                              |                    |                  |                |
| 40-49                      | 280                              | 173 (61.8)                   | 98 (35.0)          | 9 (3.2)          | 0 (0.0)        |
| 50-59                      | 495                              | 312 (63.0)                   | 161 (32.5)         | 22 (4.4)         | 0 (0.0)        |
| 60-69                      | 583                              | 347 (59.5)                   | 204 (35.0)         | 31 (5.3)         | 1 (0.2)        |
| 70-79                      | 368                              | 231 (62.8)                   | 127 (34.5)         | 10 (2.7)         | 0 (0.0)        |
| <b>Female</b>              |                                  |                              |                    |                  |                |
| 40-49                      | 377                              | 228 (60.5)                   | 133 (35.3)         | 15 (4.0)         | 1 (0.3)        |
| 50-59                      | 863                              | 560 (64.9)                   | 276 (32.0)         | 26 (3.0)         | 1 (0.1)        |
| 60-69                      | 938                              | 617 (65.8)                   | 295 (31.5)         | 25 (2.7)         | 1 (0.1)        |
| 70-79                      | 653                              | 434 (66.5)                   | 198 (30.3)         | 20 (3.1)         | 1 (0.2)        |
| <b>Both</b>                |                                  |                              |                    |                  |                |
| 40-49                      | 657                              | 401 (61.0)                   | 231 (35.2)         | 24 (3.7)         | 1 (0.2)        |
| 50-59                      | 1358                             | 872 (64.2)                   | 437 (32.2)         | 48 (3.5)         | 1 (0.1)        |
| 60-69                      | 1521                             | 964 (63.4)                   | 499 (32.8)         | 56 (3.7)         | 2 (0.1)        |
| 70-79                      | 1021                             | 665 (65.1)                   | 325 (31.8)         | 30 (2.9)         | 1 (0.1)        |
| <b>Overall</b>             | <b>4557</b>                      | <b>2902 (63.7)</b>           | <b>1492 (32.7)</b> | <b>158 (3.5)</b> | <b>5 (0.1)</b> |

SBP = systolic blood pressure; DBP = diastolic blood pressure. Analyses are standardised for area, and where appropriate for age and sex.

Exclusions as in Table 1. Each percentage is that of the specified subgroup of the participants in each row.

**Table S9. Baseline characteristics of the 127 253 study participants in the prospective analyses\***

|                                            | Men<br>(56 335) | Women<br>(70 918) | All<br>(127 253) |
|--------------------------------------------|-----------------|-------------------|------------------|
| Age at entry (years), n (%)                |                 |                   |                  |
| 35-39                                      | 9156 (16)       | 12 144 (17)       | 21 300 (17)      |
| 40-49                                      | 16 316 (29)     | 21 002 (30)       | 37 318 (29)      |
| 50-59                                      | 14 442 (26)     | 17 656 (25)       | 32 098 (25)      |
| 60-69                                      | 10 016 (18)     | 12 392 (17)       | 22 408 (18)      |
| 70-79                                      | 6405 (11)       | 7724 (11)         | 14 129 (11)      |
| Age (years), mean (SD)                     | 53 (12)         | 53 (12)           | 53 (12)          |
| Blood pressure (mm Hg), mean (SD)          |                 |                   |                  |
| Systolic                                   | 125 (14)        | 124 (16)          | 124 (15)         |
| Diastolic                                  | 81 (9)          | 79 (10)           | 80 (10)          |
| Area, n (%)                                |                 |                   |                  |
| Matanzas                                   | 25 067 (44)     | 30 719 (43)       | 55 786 (44)      |
| Camagüey                                   | 22 705 (40)     | 28 624 (40)       | 51 329 (40)      |
| Pinar del Río                              | 4522 (8)        | 5441 (8)          | 9963 (8)         |
| Ciudad de La Habana                        | 2842 (5)        | 4578 (6)          | 7420 (6)         |
| La Habana                                  | 1199 (2)        | 1556 (2)          | 2755 (2)         |
| Educational level, n (%)                   |                 |                   |                  |
| Less than primary                          | 2919 (5)        | 4899 (7)          | 7818 (6)         |
| Primary                                    | 13 365 (24)     | 20 943 (30)       | 34 308 (27)      |
| Lower secondary                            | 15 243 (27)     | 19 932 (28)       | 35 175 (28)      |
| High school/technical college              | 19 100 (34)     | 18 815 (27)       | 37 915 (30)      |
| University                                 | 5708 (10)       | 6329 (9)          | 12 037 (9)       |
| Ethnicity                                  |                 |                   |                  |
| White                                      | 43 559 (77)     | 54 403 (77)       | 97 962 (77)      |
| Black                                      | 8243 (15)       | 10 098 (14)       | 18 341 (14)      |
| Mixed                                      | 4341 (8)        | 6175 (9)          | 10 516 (8)       |
| Other                                      | 192 (<1)        | 242 (<1)          | 434 (<1)         |
| Prior cardiovascular disease               |                 |                   |                  |
| No                                         | 56 335 (100)    | 70 918 (100)      | 127 253 (100)    |
| Yes                                        | 0 (0)           | 0 (0)             | 0 (0)            |
| Season of baseline survey, n (%)†          |                 |                   |                  |
| Spring                                     | 11 778 (21)     | 15 123 (21)       | 26 901 (21)      |
| Summer                                     | 18 425 (33)     | 22 280 (31)       | 40 705 (32)      |
| Autumn                                     | 11 380 (20)     | 14 991 (21)       | 26 371 (21)      |
| Winter                                     | 14 752 (26)     | 18 524 (26)       | 33 276 (26)      |
| Ever smoked tobacco, n (%)                 | 33 302 (59)     | 23 364 (33)       | 56 666 (45)      |
| At least weekly alcohol consumption, n (%) | 16 553 (29)     | 3266 (5)          | 19 819 (16)      |
| BMI (kg/m <sup>2</sup> ), mean (SD)        | 24.1 (3.7)      | 24.4 (4.4)        | 24.3 (4.1)       |

\*Excludes participants with missing information, those with implausible blood pressure values, or those without follow-up at age 35-79 year. In addition excludes those with prior history at baseline of angina, myocardial infarction or stroke.

†Spring indicates March to May; Summer, June to August; Autumn, September to November; Winter, December to February.

**Figure S1. Age- and sex-specific relevance of hypertension to cardiovascular mortality**

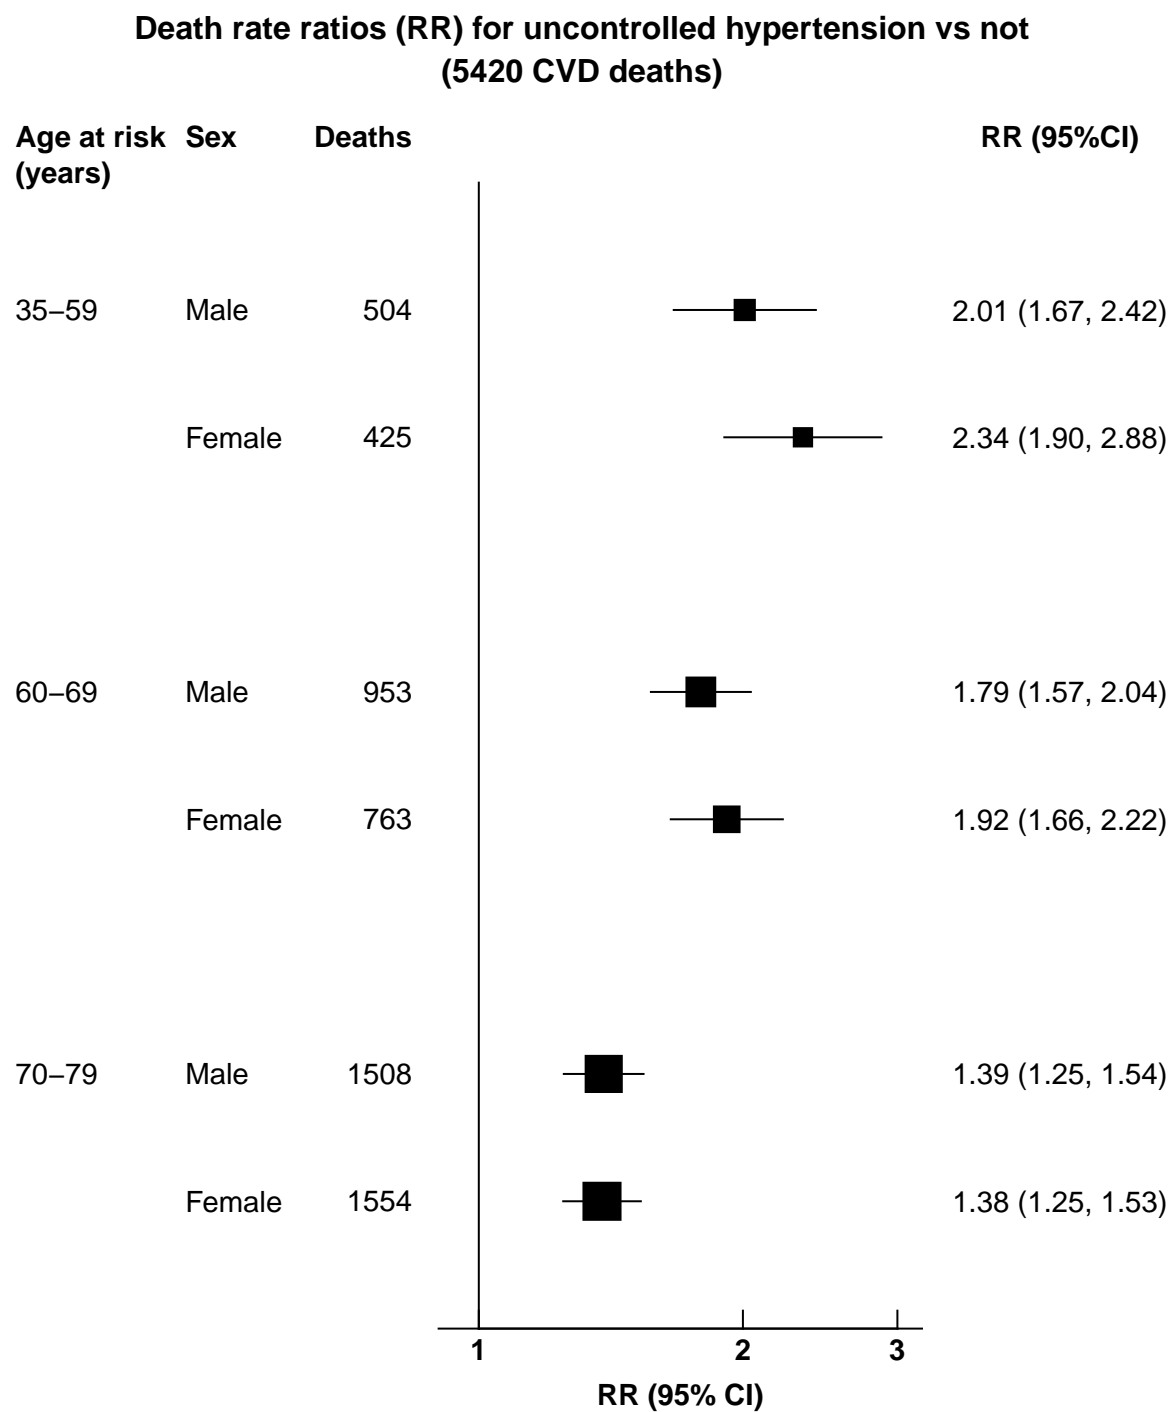

Death rate ratios (RRs) are calculated for participants with vs without uncontrolled hypertension. RRs are adjusted for area, level of education, smoking, alcohol, body mass index and age (in 5-year bands) within each age group. Exclusions as in Table 1 with further exclusion of those participants with a prior cardiovascular disease at baseline. For each RR, the area of the square is inversely proportional to the variance of the log risk.

**Table S10. Prevalence and control of hypertension at baseline using four different definitions of hypertension\***

| Age at entry<br>(years) | No. of<br>participants | Standard definition |             | Alternative definition 1 |             | Alternative definition 2 |             | Alternative definition 3 |             |  |
|-------------------------|------------------------|---------------------|-------------|--------------------------|-------------|--------------------------|-------------|--------------------------|-------------|--|
|                         |                        | Prevalence, %       | Control, %  | Prevalence, %            | Control, %  | Prevalence, %            | Control, %  | Prevalence, %            | Control, %  |  |
| <b>Male</b>             |                        |                     |             |                          |             |                          |             |                          |             |  |
| 35-39                   | 9291                   | 18.9                | 11.7        | 19.4                     | 13.9        | 21.8                     | 23.3        | 22.3                     | 24.9        |  |
| 40-49                   | 16 774                 | 26.4                | 13.1        | 27.0                     | 15.4        | 29.3                     | 21.9        | 30.0                     | 23.8        |  |
| 50-59                   | 15 347                 | 34.9                | 15.4        | 36.0                     | 17.9        | 38.1                     | 22.4        | 39.1                     | 24.6        |  |
| 60-69                   | 11 192                 | 41.2                | 14.5        | 42.9                     | 18.0        | 44.7                     | 21.2        | 46.5                     | 24.2        |  |
| 70-79                   | 7560                   | 42.5                | 14.5        | 45.2                     | 19.6        | 45.9                     | 20.9        | 48.6                     | 25.3        |  |
| <b>All</b>              | <b>60 164</b>          | <b>32.0</b>         | <b>14.2</b> | <b>33.2</b>              | <b>17.3</b> | <b>35.2</b>              | <b>21.9</b> | <b>36.4</b>              | <b>24.5</b> |  |
| <b>Female</b>           |                        |                     |             |                          |             |                          |             |                          |             |  |
| 35-39                   | 12 301                 | 14.1                | 19.6        | 14.8                     | 23.4        | 17.6                     | 36.0        | 18.3                     | 38.4        |  |
| 40-49                   | 21 651                 | 24.7                | 21.0        | 25.8                     | 24.1        | 29.2                     | 33.0        | 30.2                     | 35.3        |  |
| 50-59                   | 19 014                 | 40.6                | 21.8        | 42.1                     | 24.5        | 46.2                     | 31.1        | 47.6                     | 33.3        |  |
| 60-69                   | 13 920                 | 49.4                | 20.5        | 50.9                     | 23.0        | 55.0                     | 28.7        | 56.6                     | 30.7        |  |
| 70-79                   | 9061                   | 50.2                | 18.1        | 52.6                     | 21.8        | 55.4                     | 25.7        | 57.8                     | 28.9        |  |
| <b>All</b>              | <b>75 947</b>          | <b>34.7</b>         | <b>20.6</b> | <b>36.1</b>              | <b>23.5</b> | <b>39.6</b>              | <b>30.4</b> | <b>41.0</b>              | <b>32.7</b> |  |
| <b>Both</b>             |                        |                     |             |                          |             |                          |             |                          |             |  |
| 35-39                   | 21 592                 | 16.2                | 15.5        | 16.8                     | 18.6        | 19.5                     | 29.7        | 20.1                     | 31.8        |  |
| 40-49                   | 38 425                 | 25.5                | 17.4        | 26.3                     | 20.1        | 29.2                     | 28.1        | 30.1                     | 30.2        |  |
| 50-59                   | 34 361                 | 38.1                | 19.2        | 39.4                     | 21.9        | 42.6                     | 27.7        | 43.9                     | 29.9        |  |
| 60-69                   | 25 112                 | 45.8                | 18.1        | 47.4                     | 21.0        | 50.5                     | 25.8        | 52.1                     | 28.1        |  |
| 70-79                   | 16 621                 | 46.8                | 16.6        | 49.3                     | 20.9        | 51.2                     | 23.8        | 53.7                     | 27.4        |  |
| <b>Overall</b>          | <b>136 111</b>         | <b>33.5</b>         | <b>17.9</b> | <b>34.8</b>              | <b>20.9</b> | <b>37.6</b>              | <b>26.9</b> | <b>38.9</b>              | <b>29.3</b> |  |

SBP = systolic blood pressure; DBP = diastolic blood pressure. Analyses are standardised for area, and where appropriate for age and sex. Exclusions as in Table 1.

Each percentage is that of the specified subgroup of the participants in each row.

\* Standard definition: Measured SBP  $\geq$  140 mm Hg or DBP  $\geq$  90 mm Hg or (diagnosed AND treated with any of ace inhibitors, beta-blockers, ca antagonist, diuretics).

Alternative definition 1: Measured SBP  $\geq$  140 mm Hg or DBP  $\geq$  90 mm Hg or treated with any of ace inhibitors, beta-blockers, ca antagonist, diuretics.

Alternative definition 2: Measured SBP  $\geq$  140 mm Hg or DBP  $\geq$  90 mm Hg or diagnosed.

Alternative definition 3: Measured SBP  $\geq$  140 mm Hg or DBP  $\geq$  90 mm Hg or (diagnosed AND/OR treated with any of ace inhibitors, beta-blockers, ca antagonist, diuretics).
